# Supplementary material for: Exploring the supramolecular profile of 5-phenylhydantoins
Source: Royal Society of Chemistry journal article supplement (doi:10.1039/d3ce00213f), 2023-01-01
Supplement: d3ce00213f1.pdf [file d3ce00213f1.pdf]

## Electronic Supplementary Information

### Exploring the supramolecular profile of 5-phenylhydantoins

Anita Lazić,<sup>a</sup> Lidija Radovanović,<sup>a</sup> Jelena Rogan,<sup>b</sup> Nataša Valentić,<sup>b</sup> Goran Janjić,<sup>c</sup> Ivana Đorđević<sup>c</sup>  
and Nemanja Trišović\*<sup>b</sup>

<sup>a</sup> University of Belgrade, Innovation Centre of the Faculty of Technology and Metallurgy, Karnegijeva 4, 11120 Belgrade, Serbia.

<sup>b</sup> University of Belgrade, Faculty of Technology and Metallurgy, Karnegijeva 4, 11120 Belgrade, Serbia.  
E-mail: ntrisovic@tmf.bg.ac.rs

<sup>c</sup> University of Belgrade - Institute of Chemistry, Technology and Metallurgy, Department of Chemistry, National Institute of the Republic of Serbia, Njegoševa 12, 11001 Belgrade, Serbia.

**Table S1** Selected bond lengths (Å) and angles (°) in the investigated compounds.

|          | <b>1</b> | <b>2</b> | <b>3</b> | <b>4</b> |
|----------|----------|----------|----------|----------|
| N1 C2    | 1.334(2) | 1.333(2) | 1.332(3) | 1.336(2) |
| C2 O1    | 1.228(2) | 1.216(2) | 1.214(3) | 1.223(2) |
| C2 N3    | 1.384(2) | 1.395(2) | 1.392(3) | 1.390(3) |
| N3 C4    | 1.369(2) | 1.349(2) | 1.348(3) | 1.359(2) |
| C4 O2    | 1.201(2) | 1.216(2) | 1.220(2) | 1.208(2) |
| C4 C5    | 1.534(2) | 1.529(2) | 1.534(3) | 1.538(3) |
| C5 N1    | 1.460(2) | 1.452(2) | 1.458(3) | 1.459(2) |
| C5 C6    | 1.527(2) | 1.530(2) | 1.531(3) | 1.522(2) |
| C2–N1–C5 | 113.3(1) | 113.7(1) | 113.5(2) | 112.7(2) |
| O1–C2–N1 | 127.8(1) | 129.1(2) | 128.1(2) | 127.4(2) |
| O1–C2–N3 | 124.7(1) | 124.3(1) | 124.7(2) | 125.1(2) |
| N1–C2–N3 | 107.6(1) | 106.5(1) | 107.2(2) | 107.5(2) |
| C2–N3–C4 | 111.9(1) | 112.4(1) | 112.1(2) | 112.3(2) |
| O2–C4–N3 | 126.7(1) | 126.8(1) | 127.0(2) | 127.0(2) |
| O2–C4–C5 | 126.7(1) | 126.2(1) | 125.6(2) | 126.6(2) |
| N3–C4–C5 | 106.6(1) | 107.0(1) | 107.3(2) | 106.4(2) |
| N1–C5–C4 | 100.3(1) | 100.3(1) | 99.9(2)  | 100.7(1) |

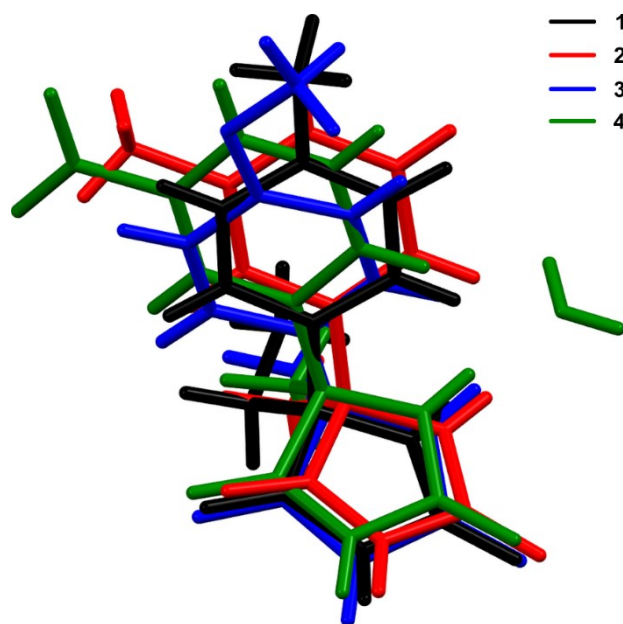

**Fig. S1** A structural overlay highlighting the differences of the conformations of **1–4**.

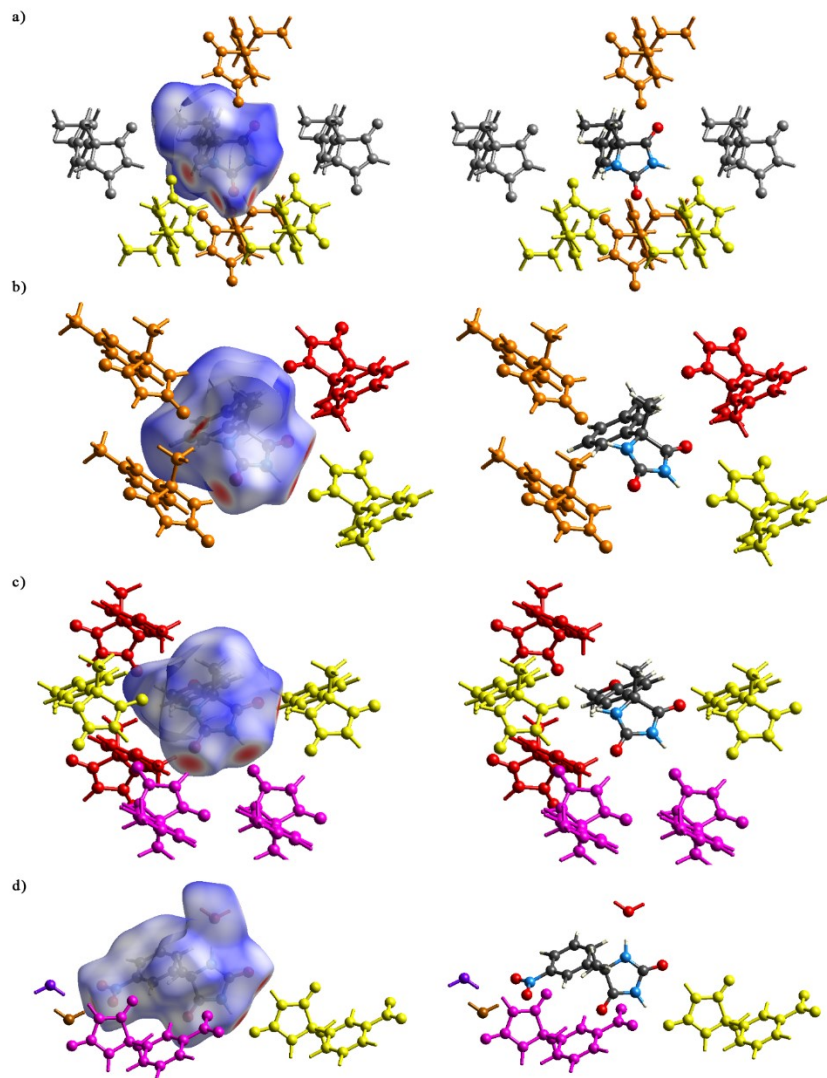

**Fig. S2** The three-dimensional Hirshfeld surface showing intermolecular interactions of **1–4** (a–d) plotted over  $d_{\text{norm}}$ . The pair of molecules colored by the same color interacts with the central unit through the same type of interaction. a) Yellow-coloured pairs of molecules are in contact with the central unit through interaction labelled as A and A' in Fig. 3; orange-coloured pairs of molecules are in contact with the central unit through interaction labelled as B and B' in Fig. 3; grey-coloured pairs of molecules are in contact with the central unit through interaction labelled as C and C' in Fig. 3. b) Orange-coloured pairs of molecules are in contact with the central unit through interaction labelled as A and A' in Fig. 3; the yellow-coloured molecule is in contact with the central unit through the interaction labelled as B in Fig. 3; the red-coloured molecule is in contact with the central unit through interaction labelled as C in Fig. 3. c) Yellow-coloured pairs of molecules are in contact with the central unit through interaction labelled as A and A' in Fig. 3; red-coloured pairs of molecules are in contact with the central unit through interaction labelled as B and B' in Fig. 3; cyclamen-coloured pairs of molecules are in contact with the central unit through interaction labelled as C and C' in Fig. 3. d) Yellow-coloured molecule is in contact with the central unit through interaction labelled as A in Fig. 3; cyclamen-coloured molecule is in contact with the central unit through interaction labelled as B in Fig. 3; violet-coloured molecule is in contact with the central unit through interaction labelled as C in Fig. 3; brown-coloured molecule is in contact with the central unit through interaction labelled as D in Fig. 3.

**Table S2.** Calculated surface minima and maxima (kcal/mol) for compounds **1–4**.

|    | <b>1</b> |       | <b>2</b> |       | <b>3</b> |       | <b>4</b> |       |
|----|----------|-------|----------|-------|----------|-------|----------|-------|
|    | min      | max   | min      | max   | min      | max   | min      | max   |
| 1  | -35.80   | 43.24 | -35.33   | 44.12 | -35.58   | 43.74 | -30.74   | 51.20 |
| 2  | -31.74   | 41.89 | -30.95   | 42.54 | -32.30   | 41.77 | -30.59   | 48.54 |
| 3  | -11.71   | 16.31 | -12.32   | 18.55 | -18.03   | 21.79 | -29.77   | 26.22 |
| 4  | -8.09    | 16.31 | -9.91    | 17.35 | -11.20   | 19.20 | -27.84   | 25.68 |
| 5  |          | 15.31 |          | 15.96 | -9.68    | 19.00 |          | 23.52 |
| 6  |          | 15.18 |          | 15.88 | -8.39    | 18.59 |          | 20.98 |
| 7  |          | 15.09 |          | 15.86 |          | 17.92 |          | 20.97 |
| 8  |          | 14.87 |          | 13.03 |          | 17.51 |          | 20.70 |
| 9  |          | 14.19 |          | 12.25 |          | 16.49 |          | 16.86 |
| 10 |          | 13.49 |          | 12.18 |          | 15.08 |          | 14.60 |
| 11 |          | 12.77 |          | 8.97  |          | 12.77 |          | 8.00  |
| 12 |          | 10.07 |          | 7.65  |          | 7.75  |          | 4.96  |
| 13 |          | 8.18  |          |       |          | 7.39  |          |       |
| 14 |          | 7.26  |          |       |          |       |          |       |

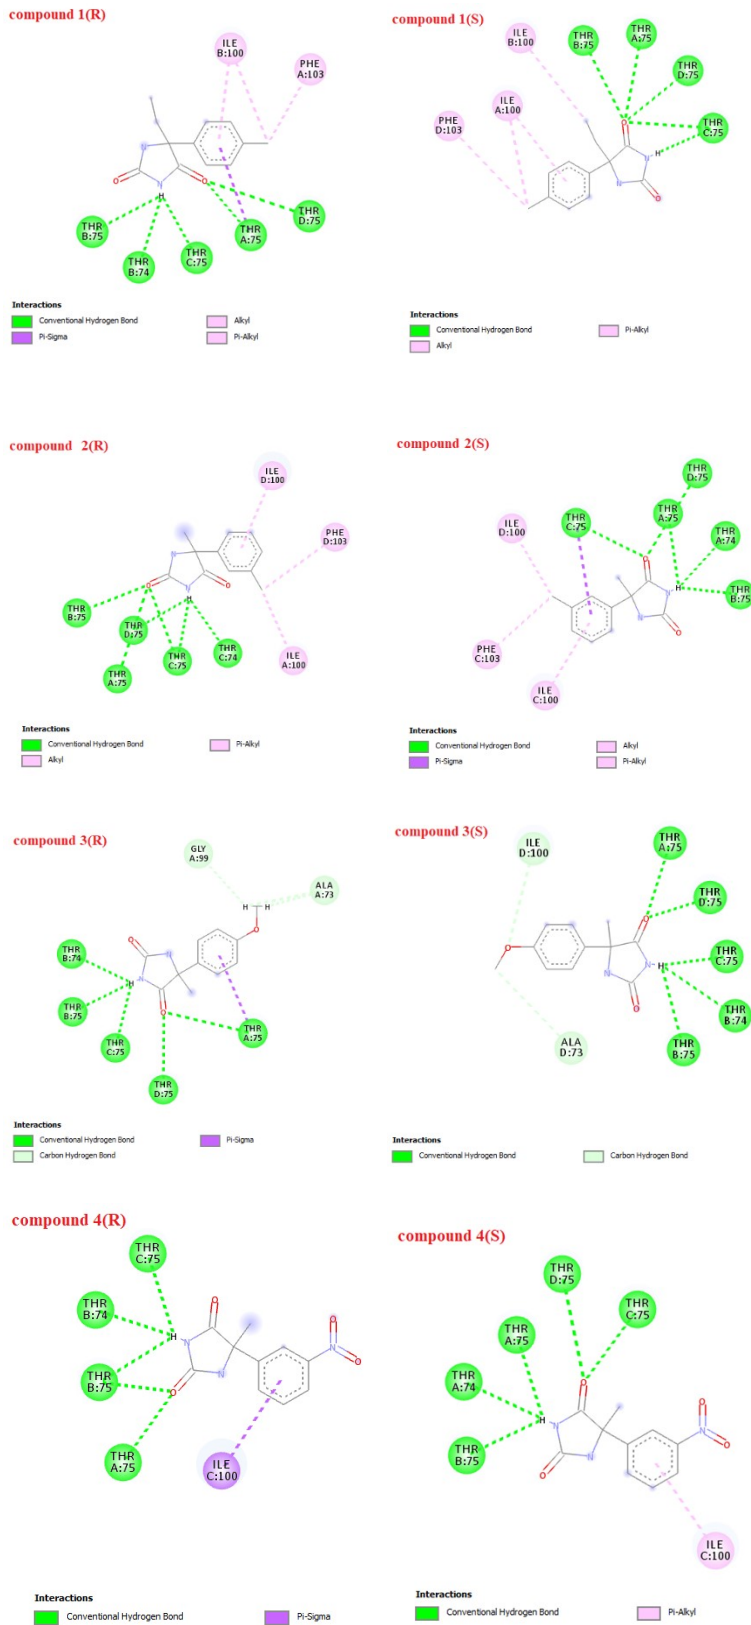

**Fig. S3** The amino-acid environment at the first binding site of investigated compounds in a closed state of VGSC, predicted by molecular docking study.

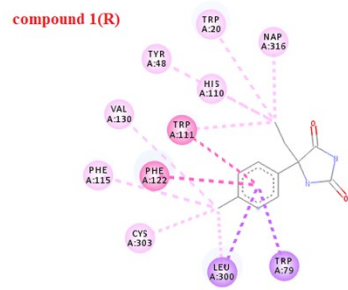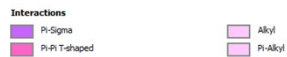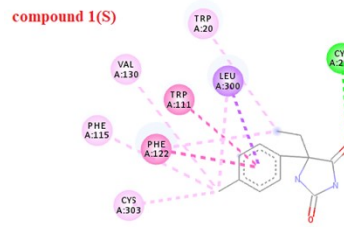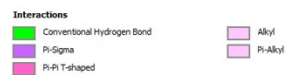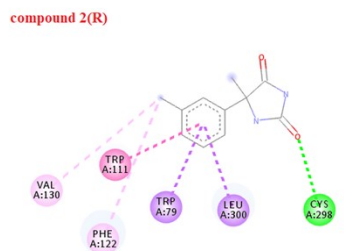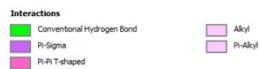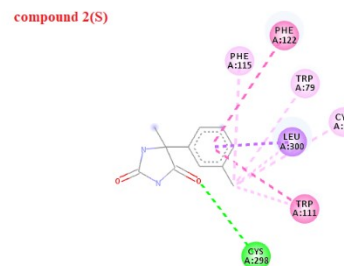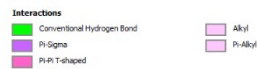

**compound 3(R)**

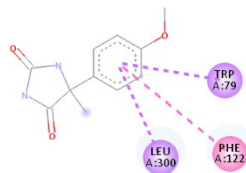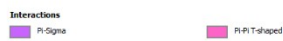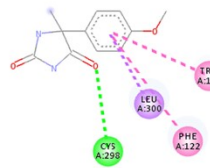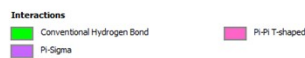

**compound 4(R)**

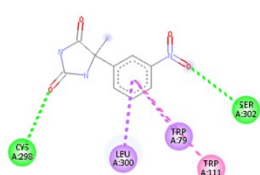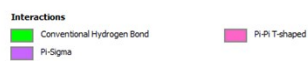

**compound 4(S)**

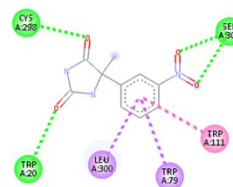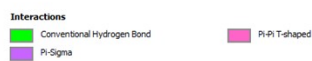

**Fig. S4** The amino-acid environment at the first binding site of investigated compounds in AR predicted by molecular docking study.

**Table S3** Binding energies (in kcal/mol) of the investigated compounds for selected enzymes, obtained by docking studies.

| Compound<br>Target | voltage-gated ion<br>channel (1BL8) |                        | MMP-12<br>(3F15)         |                        | Aldose reductase<br>(2FZD) |                        |
|--------------------|-------------------------------------|------------------------|--------------------------|------------------------|----------------------------|------------------------|
|                    | $\Delta E(\text{BS1})$              | $\Delta E(\text{BS2})$ | $\Delta E(\text{BS1})$   | $\Delta E(\text{BS2})$ | $\Delta E(\text{BS1})$     | $\Delta E(\text{BS2})$ |
| <b>1(R)</b>        | -7.2                                | -                      | -8.0 (bm1)<br>-7.8 (bm2) | -                      | -7.9                       | -7.1                   |
| <b>1(S)</b>        | -7.0                                | -                      | -8.6 (bm2)               | -                      | -7.6                       | -6.6                   |
| <b>2(R)</b>        | -7.2                                | -                      | -7.8 (bm1)<br>-7.8 (bm2) | -                      | -7.9                       | -6.6                   |
| <b>2(S)</b>        | -7.0                                | -                      | -8.2 (bm1)<br>-7.5 (bm2) | -                      | -7.9                       | -                      |
| <b>3(R)</b>        | -6.6                                | -                      | -7.9 (bm2)               | -                      | -7.4                       | -                      |
| <b>3(S)</b>        | -6.5                                | -                      | -8.2 (bm2)               | -                      | -7.3                       | -                      |
| <b>4(R)</b>        | -7.0                                | -                      | -7.5 (bm3)<br>-7.1 (bm2) | -                      | -7.6                       | -                      |
| <b>4(S)</b>        | -6.8                                | -                      | -8.4 (bm3)<br>-7.1 (bm2) | -                      | -7.6                       | -                      |
